# Supplementary material for: Functional connectivity gradients of the cingulate cortex
Source: PubMed Central journal article supplement (PMC10279697; doi:10.1038/s42003-023-05029-0), 2023-06-19
Supplement: 42003_2023_5029_MOESM1_ESM.pdf [file 42003_2023_5029_MOESM1_ESM.pdf]

1

## Supplementary information

2 **Supplementary Table 1** Demographic and cognitive information of the discovery and

3 validation datasets

| Characteristic             | Discovery     | CNP                                                                                             | SALD          |
|----------------------------|---------------|-------------------------------------------------------------------------------------------------|---------------|
| Sample size                | 361           | 103                                                                                             | 329           |
| Age (years)                | 28.84 ± 10.83 | 30.87 ± 8.56                                                                                    | 37.81 ± 13.79 |
| Education (years) *        | 14.94 ± 3.32  | 15.20 ± 1.63                                                                                    | -             |
| Gender (F/M)               | 183/178       | 47/56                                                                                           | 207/122       |
| FD (mm)                    | 0.13 ± 0.07   | 0.17 ± 0.08                                                                                     | 0.15 ± 0.08   |
| Race                       | Chinese Han   | White (82)<br>American Indian or Alaskan Native (19)<br>Asian (1)<br>Black/African American (1) | Chinese Han   |
| Handedness                 | Right         | Right                                                                                           | Right         |
| CVLT                       |               |                                                                                                 |               |
| Short delay free recall ** | 12.73 ± 2.29  | 12.80 ± 2.33                                                                                    | -             |
| Long delay free recall **  | 13.07 ± 2.18  | 13.16 ± 2.40                                                                                    | -             |
| Trial 1-5 total **         | 56.39 ± 8.20  | 56.38 ± 7.91                                                                                    | -             |
| Personality factors        |               |                                                                                                 |               |
| Neuroticism **             | 28.11 ± 6.36  | -                                                                                               | -             |
| Extraversion **            | 42.82 ± 6.36  | -                                                                                               | -             |
| Conscientiousness **       | 44.16 ± 5.35  | -                                                                                               | -             |

|                               |              |              |   |
|-------------------------------|--------------|--------------|---|
| Agreeableness **              | 45.24 ± 3.75 | -            | - |
| Openness **                   | 40.43 ± 4.43 | -            | - |
| The accuracy of 3-back (%) ** | 72 ± 15      | -            | - |
| MoCA ***                      | 25.03 ± 3.94 | -            | - |
| MPQ                           | -            | 18.33 ± 4.79 | - |
| HPS                           | -            | 16.14 ± 7.71 | - |
| BP-II                         | -            | 11.32 ± 4.53 | - |
| WAIS                          |              |              |   |
| Letter number sequencing      | -            | 21.06 ± 2.76 | - |
| Matrix reasoning              | -            | 20.54 ± 4.17 | - |
| Vocabulary                    | -            | 43.70 ± 7.91 | - |

1 Except for sample size and gender, other data are expressed as mean ± standard deviation.

2 Abbreviations: CNP, Consortium for Neuropsychiatric Phenomics; SALD, Southwest

3 University Adult Lifespan Dataset; F, female; M, male; FD, frame-wise displacement; CVLT,

4 California Verbal Learning Test; MoCA, Montreal Cognitive Assessment; MPQ,

5 Multidimensional Personality Questionnaire; HPS, Hypomanic Personality Scale; BP-II,

6 Scale for Traits that Increase Risk for Bipolar II Disorder; WAIS, Wechsler Adult Intelligence

7 Scale.

8 \* The data are available for 360 from 361 participants in the discovery dataset.

9 \*\* The data are available for 215 from 361 participants in the discovery dataset.

10 \*\*\* The data are available for 78 from 361 participants in the discovery dataset.

11

1 **Supplementary Table 2** Resting-state fMRI parameters for three datasets

| <b>Parameters</b>             | <b>Discovery</b>                          | <b>CNP</b>        | <b>SALD</b>       |
|-------------------------------|-------------------------------------------|-------------------|-------------------|
| Scanner                       | 3.0T General Electric<br>Discovery MR750w | 3.0T Siemens Trio | 3.0T Siemens Trio |
| Sequence                      | GRE-SS-EPI                                | T2*-weighted EPI  | GRE-EPI           |
| TR (ms)                       | 2000                                      | 2000              | 2000              |
| TE (ms)                       | 30                                        | 30                | 30                |
| FA (°)                        | 90                                        | 90                | 90                |
| FOV (mm <sup>2</sup> )        | 220 × 220                                 | 192 × 192         | 220 × 220         |
| Matrix size                   | 64 × 64                                   | 64 × 64           | 64 × 64           |
| Voxel size (mm <sup>3</sup> ) | 3.4 × 3.4 × 4                             | 3 × 3 × 4         | 3.4 × 3.4 × 4     |
| Slice thickness (mm)          | 3                                         | 4                 | 3                 |
| Slice gap (mm)                | 1                                         | -                 | 1                 |
| Slices                        | 35                                        | 34                | 32                |
| Time points                   | 185                                       | 152               | 242               |

2 Abbreviations: fMRI, functional magnetic resonance imaging; CNP, Consortium for  
3 Neuropsychiatric Phenomics; SALD, Southwest University Adult Lifespan Dataset; GRE,  
4 gradient echo; SS, single shot; EPI, echo planar imaging; TR, repetition time; TE, echo time;  
5 FA, flip angle; FOV, field of view.

6

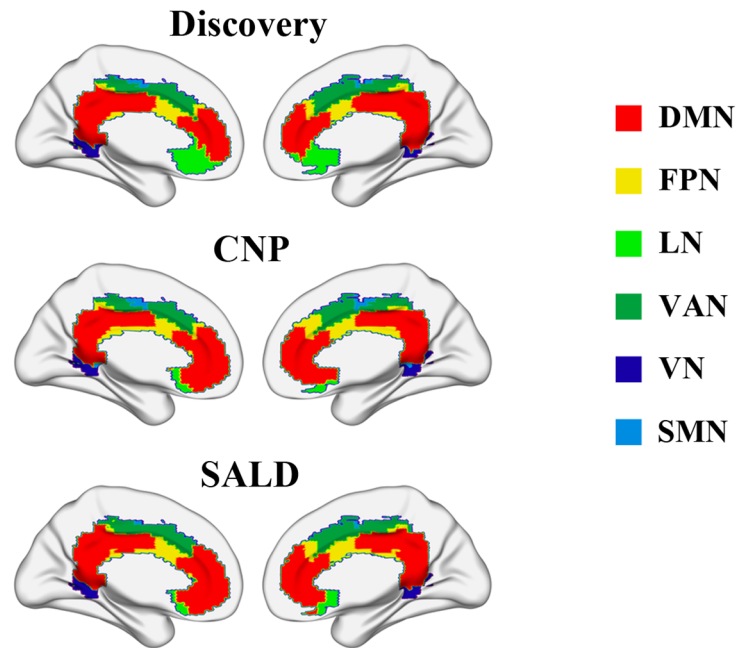

1

2 **Supplementary Fig. 1** The cingulate functional atlas created using a combination of the  
 3 winner-take-all method and the seven-network parcellation. The functional subdivision  
 4 corresponding to the dorsal attention network was not found. Abbreviations: DMN, default  
 5 mode network; VN, visual network; LN, limbic network; FPN, frontoparietal network; VAN,  
 6 ventral attention network; SMN, sensorimotor network; CNP, Consortium for  
 7 Neuropsychiatric Phenomics; SALD, Southwest University Adult Lifespan Dataset.

8

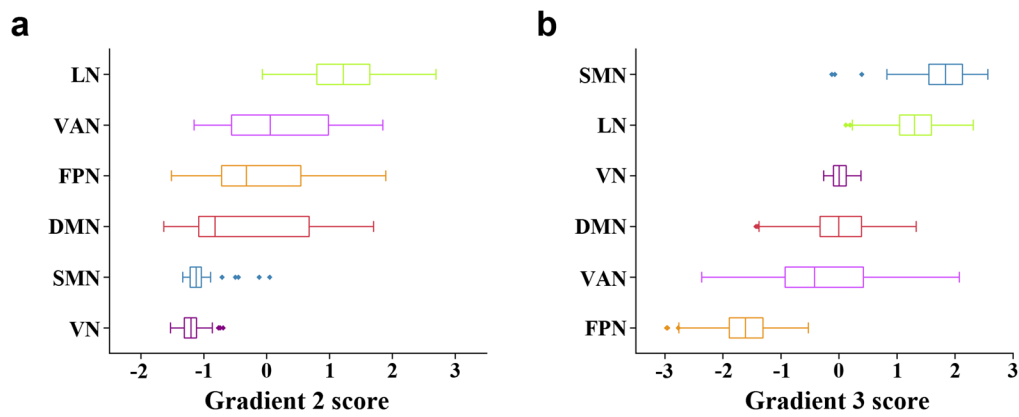

1

2 **Supplementary Fig. 2** Relationships of cingulate gradients 2 and 3 with functional networks

3 in the discovery dataset. Box plots showing distributions of the cingulate functional

4 subdivisions corresponding to the canonical functional networks along gradient 2 **(a)** and 3

5 **(b)**. The functional subdivision corresponding to the dorsal attention network was not found.

6 Abbreviations: DMN, default mode network; VN, visual network; LN, limbic network; FPN,

7 frontoparietal network; VAN, ventral attention network; SMN, sensorimotor network.

8

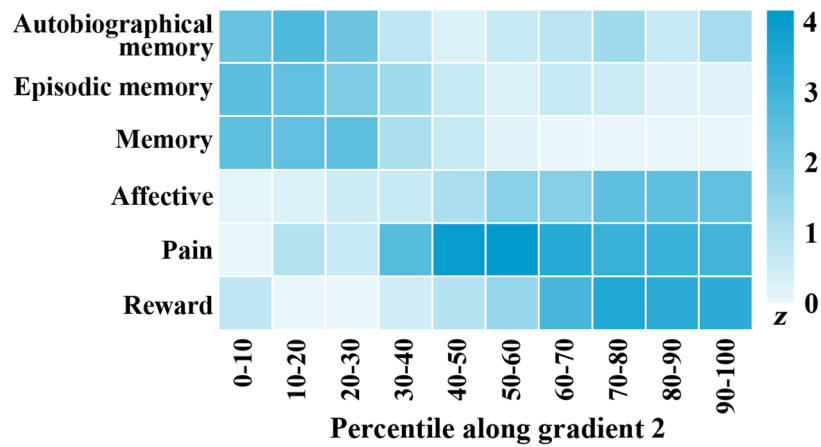

1

2 **Supplementary Fig. 3** Associations of cingulate gradient 2 with behavioral terms from the  
 3 NeuroSynth in the discovery dataset. To establish a link between gradient and behavior, the  
 4 gradient map was binned into ten-percentile increments and then binarized, yielding 10 binary  
 5 masks ranging from 0-10% to 90-100%. For each behavioral term, the average z-statistics  
 6 within the 10 masks were extracted.

7

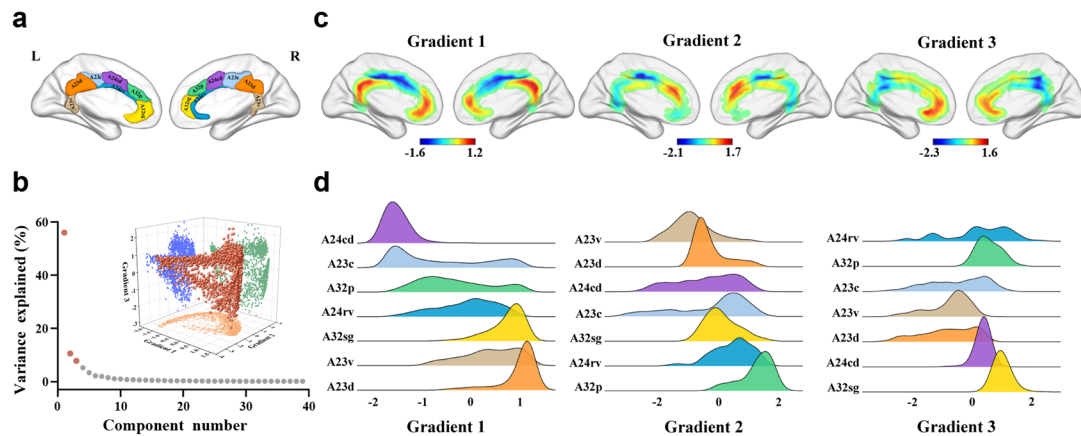

1

2 **Supplementary Fig. 4** Functional connectivity gradients of the cingulate cortex in the CNP

3 dataset. **a** Illustration of cingulate subregions. **b** Connectivity variance explained by the

4 functional connectivity gradients and inserted scatter plots of the first three gradients. The

5 three-dimensional scatter plot shows the distributions of gradients 1-3 of all cingulate voxels,

6 and is projected into 3 two-dimensional scatter plots showing the distributions of any pair of

7 the three gradients. **c** Topographies of the first three cingulate functional connectivity

8 gradients. **d** Distributions of cingulate subregions along the first three gradients.

9 Abbreviations: L, left; R, right; A23v, ventral area 23; A23d, dorsal area 23; A23c, caudal

10 area 23; A24cd, caudodorsal area 24; A24rv, rostroventral area 24; A32p, pregenual area 32;

11 A32sg, subgenual area 32; CNP, Consortium for Neuropsychiatric Phenomics.

12

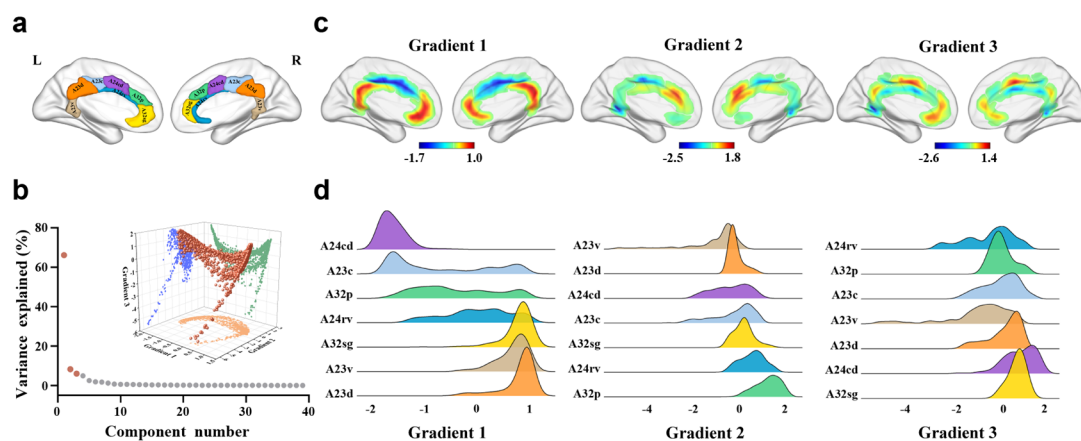

1

2 **Supplementary Fig. 5** Functional connectivity gradients of the cingulate cortex in the SALD

3 dataset. **a** Illustration of cingulate subregions. **b** Connectivity variance explained by the

4 functional connectivity gradients and inserted scatter plots of the first three gradients. The

5 three-dimensional scatter plot shows the distributions of gradients 1-3 of all cingulate voxels,

6 and is projected into 3 two-dimensional scatter plots showing the distributions of any pair of

7 the three gradients. **c** Topographies of the first three cingulate functional connectivity

8 gradients. **d** Distributions of cingulate subregions along the first three gradients.

9 Abbreviations: L, left; R, right; A23v, ventral area 23; A23d, dorsal area 23; A23c, caudal

10 area 23; A24cd, caudodorsal area 24; A24rv, rostroventral area 24; A32p, pregenual area 32;

11 A32sg, subgenual area 32; SALD, Southwest University Adult Lifespan Dataset.

12



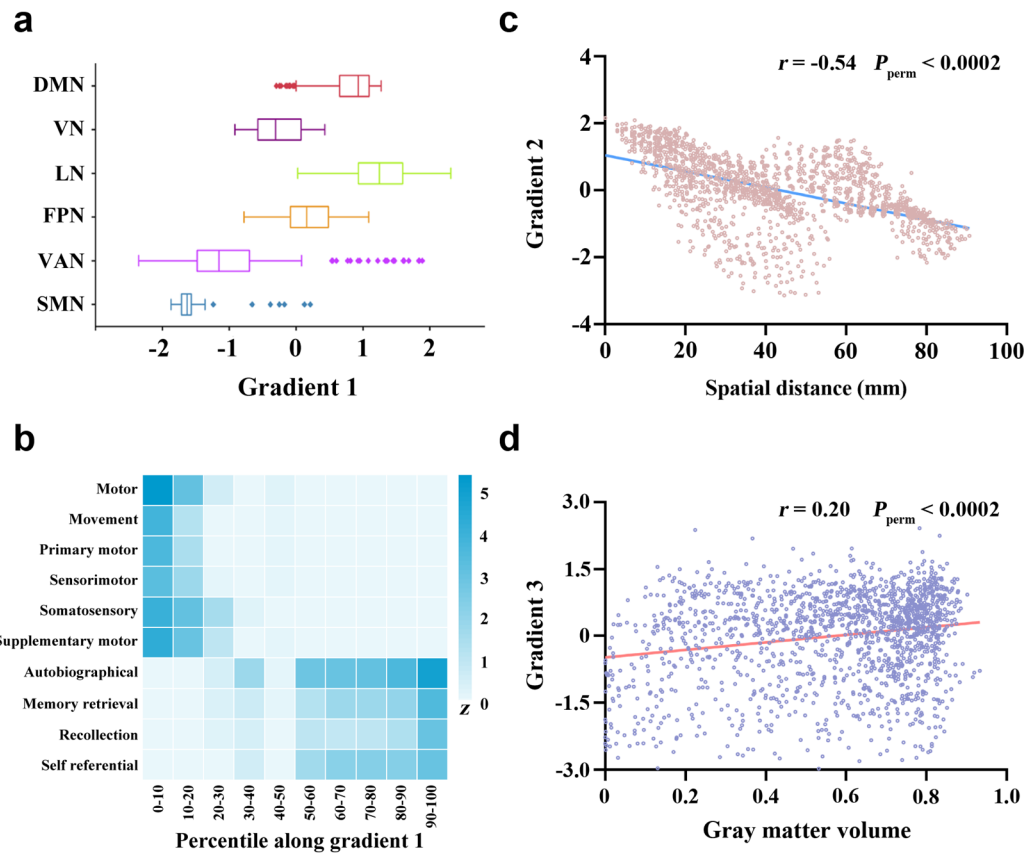

1

2 **Supplementary Fig. 6** Relationships of cingulate functional connectivity gradients with

3 functional networks, behavioral domains, intrinsic geometry, and gray matter in the

4 CNP dataset. **a** Box plots showing distributions of the cingulate functional subdivisions

5 corresponding to the canonical functional networks along gradient 1. The functional

6 subdivision corresponding to the dorsal attention network was not found. **b** Associations of

7 cingulate gradient 1 with behavioral terms from the NeuroSynth. To establish a link between

8 gradient and behavior, the gradient map was binned into ten-percentile increments and then

9 binarized, yielding 10 binary masks ranging from 0-10% to 90-100%. For each behavioral

10 term, the average *z*-statistics within the 10 masks were extracted. **c** A scatter plot of the

11 association of gradient 2 with spatial distance from the maximal gradient location in the

12 cingulate cortex. **d** A scatter plot of the spatial correlation between cingulate gradient 3 and

- 1 gray matter volume. Abbreviations: DMN, default mode network; VN, visual network; LN,
- 2 limbic network; FPN, frontoparietal network; VAN, ventral attention network; SMN,
- 3 sensorimotor network; CNP, Consortium for Neuropsychiatric Phenomics.
- 4

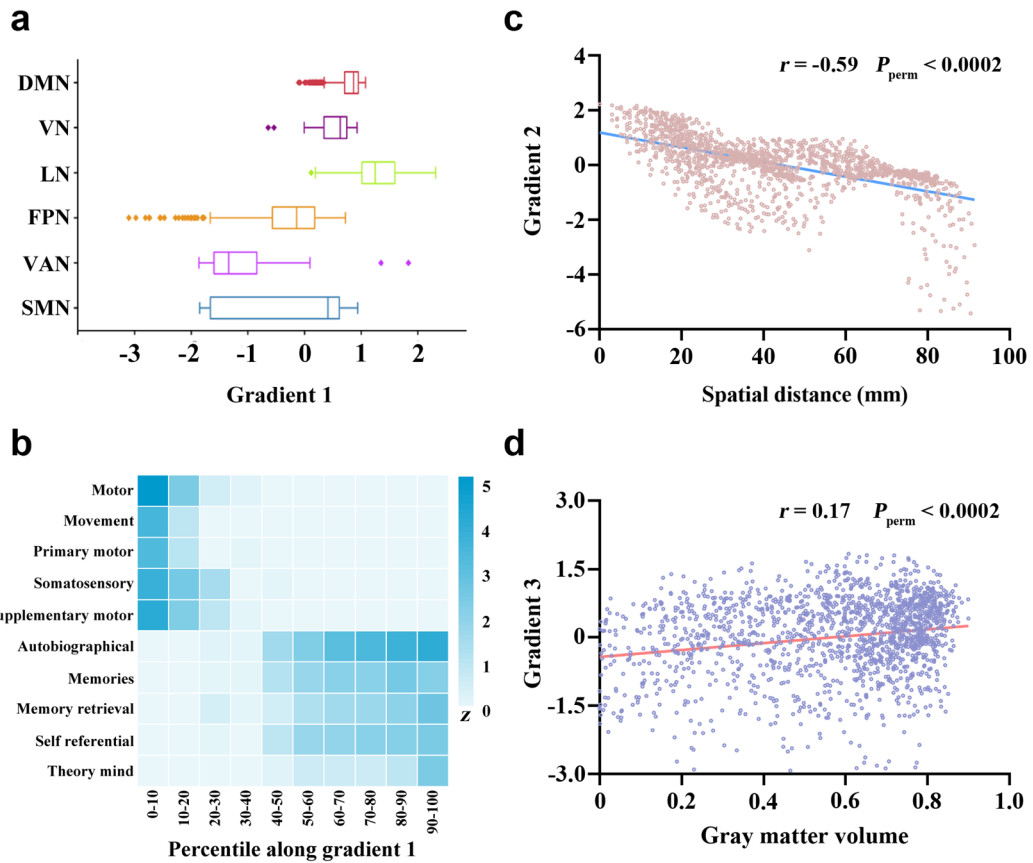

1  
2 **Supplementary Fig. 7** Relationships of cingulate functional connectivity gradients with  
3 functional networks, behavioral domains, intrinsic geometry, and gray matter volume in the  
4 SALD dataset. **a** Box plots showing distributions of the cingulate functional subdivisions  
5 corresponding to the canonical functional networks along gradient 1. The functional  
6 subdivision corresponding to the dorsal attention network was not found. **b** Associations of  
7 cingulate gradient 1 with behavioral terms from the NeuroSynth. To establish a link between  
8 gradient and behavior, the gradient map was binned into ten-percentile increments and then  
9 binarized, yielding 10 binary masks ranging from 0-10% to 90-100%. For each behavioral  
10 term, the average *z*-statistics within the 10 masks were extracted. **c** A scatter plot of the  
11 association of gradient 2 with spatial distance from the maximal gradient location in the  
12 cingulate cortex. **d** A scatter plot of the spatial correlation between cingulate gradient 3 and

- 1 gray matter volume. Abbreviations: DMN, default mode network; VN, visual network; LN,
- 2 limbic network; FPN, frontoparietal network; VAN, ventral attention network; SMN,
- 3 sensorimotor network; SALD, Southwest University Adult Lifespan Dataset.
- 4

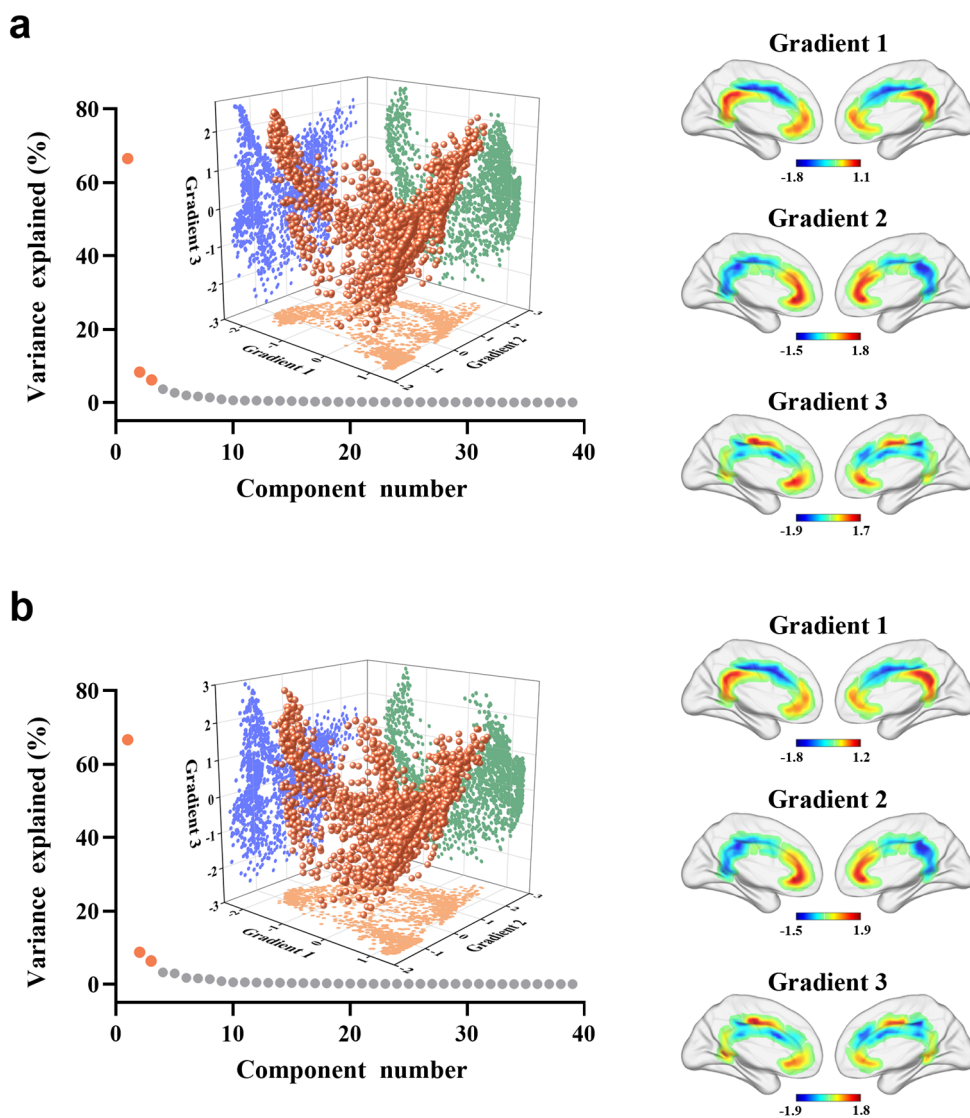

1

2 **Supplementary Fig. 8** Functional connectivity gradients of the cingulate cortex derived from

3 two other rsFC matrix thresholds of top 20% **(a)** and 30% **(b)**. On the left: connectivity

4 variance explained by the functional connectivity gradients and inserted scatter plots of the

5 first three gradients. On the right: topographies of the first three cingulate functional

6 connectivity gradients. Abbreviations: rsFC, resting-state functional connectivity.

7

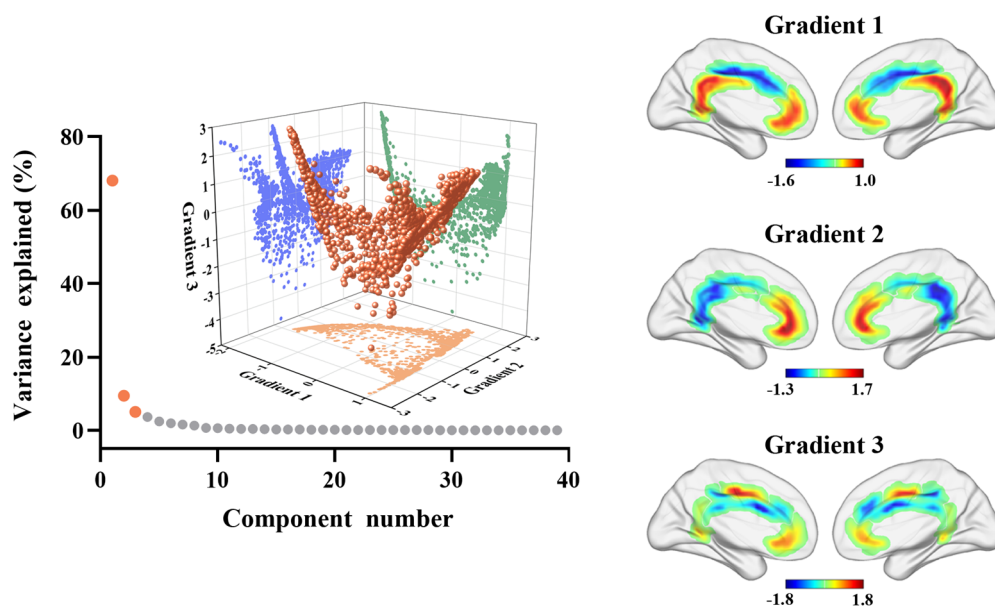

1

2 **Supplementary Fig. 9** Functional connectivity gradients of the cingulate cortex derived from

3 BOLD data with GSR. On the left: connectivity variance explained by the functional

4 connectivity gradients and inserted scatter plots of the first three gradients. On the right:

5 topographies of the first three cingulate functional connectivity gradients. Abbreviations:

6 BOLD, blood-oxygen-level-dependent; GSR, global signal regression.

7

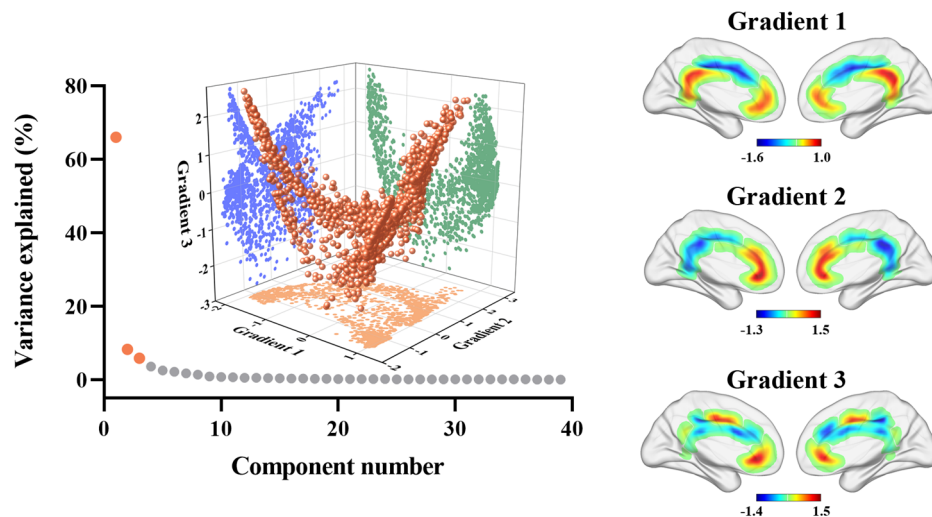

1

2 **Supplementary Fig. 10** Functional connectivity gradients of the cingulate cortex calculated

3 based on the group-level rsFC matrix by averaging individual-level rsFC matrices across

4 subjects. On the left: connectivity variance explained by the functional connectivity gradients

5 and inserted scatter plots of the first three gradients. On the right: topographies of the first

6 three cingulate functional connectivity gradients. Abbreviation: rsFC, resting-state functional

7 connectivity.

8

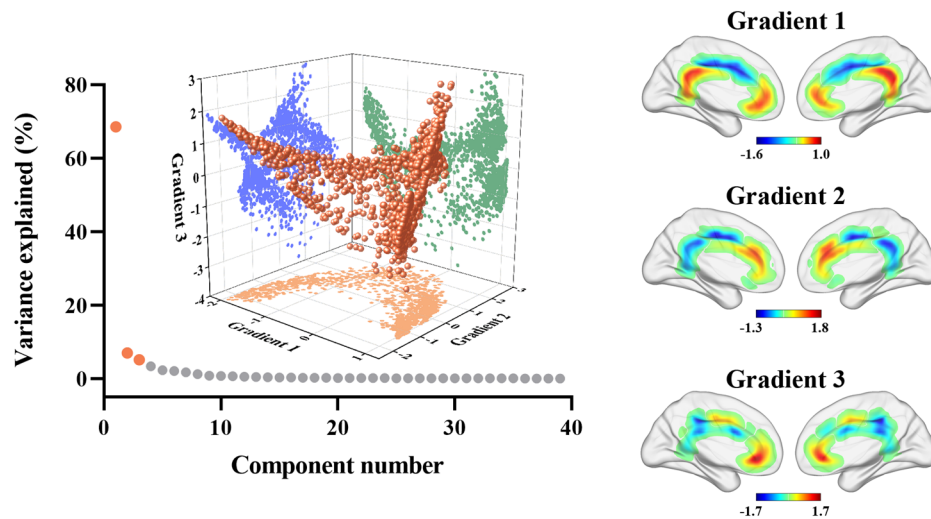

1

2 **Supplementary Fig. 11** Functional connectivity gradients of the cingulate cortex derived

3 from BOLD data preprocessed by CompCor. On the left: connectivity variance explained by

4 the functional connectivity gradients and inserted scatter plots of the first three gradients. On

5 the right: topographies of the first three cingulate functional connectivity gradients.

6 Abbreviations: BOLD, blood-oxygen-level-dependent; CompCor, component-based noise

7 correction.

8



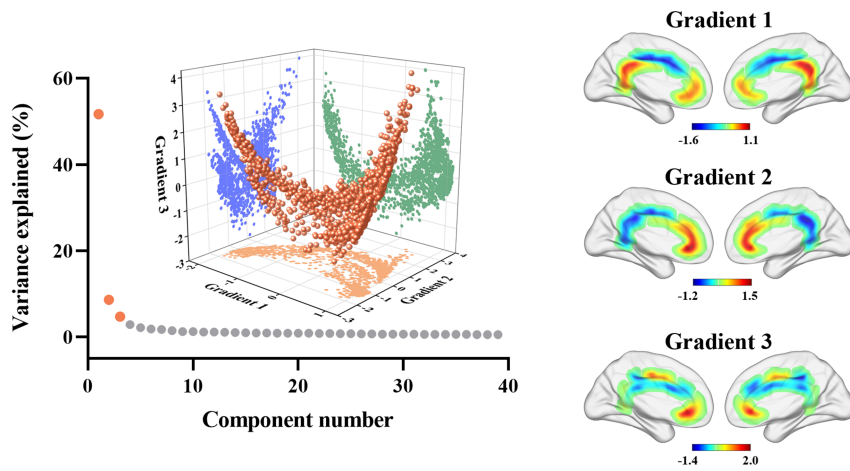

1

2 **Supplementary Fig. 12** Functional connectivity gradients of the cingulate cortex derived  
 3 from the voxel-wise cingulate cortex-to-cerebrum (including the cingulate cortex) rsFC  
 4 matrix. On the left: connectivity variance explained by the functional connectivity gradients  
 5 and inserted scatter plots of the first three gradients. On the right: topographies of the first  
 6 three cingulate functional connectivity gradients. Abbreviation: rsFC, resting-state functional  
 7 connectivity.

8

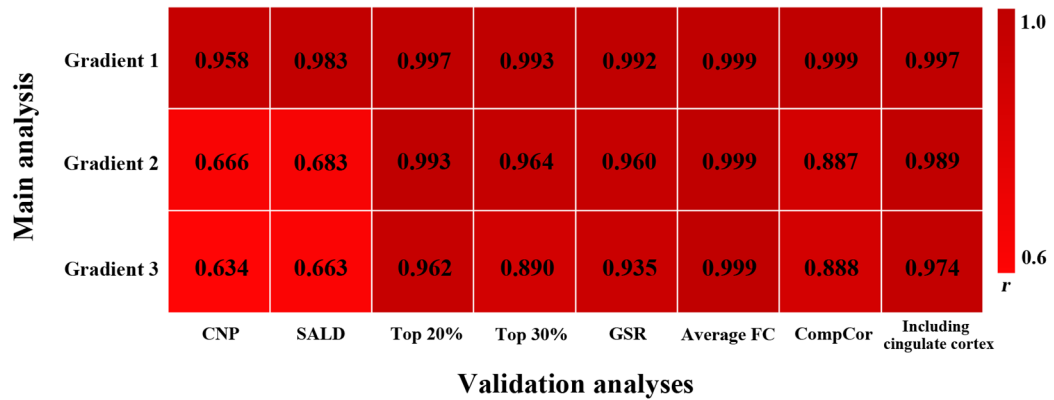

1

2 **Supplementary Fig. 13** Spatial correlation coefficients between cingulate functional

3 connectivity gradients in the main analysis and those in the validation analyses. Abbreviations:

4 CNP, Consortium for Neuropsychiatric Phenomics; SALD, Southwest University Adult

5 Lifespan Dataset; GSR, global signal regression; CompCor, component-based noise

6 correction; FC, functional connectivity.
